# Supplementary material
Source: MDPI journal article supplement (https://www.mdpi.com/2072-4292/8/10/860)

# Supplementary Materials: Mapping Smallholder Wheat Yields and Sowing Dates Using Micro-Satellite Data

Meha Jain, Amit K. Srivastava, Balwinder-Singh, Rajiv K. Joon, Andrew McDonald, Keitasha Royal, Madeline C. Lisaius and David B. Lobell

**Table S1.** Mask classification accuracy for agriculture versus non-agriculture landcover classes in both the training and validation data using random forest models.

| Data       | Agriculture | Non-Agriculture | User's Accuracy % |
|------------|-------------|-----------------|-------------------|
| Training   | 162         | 0               | 100               |
|            | 0           | 38              | 100               |
| Validation | 61          | 14              | 81.33             |
|            | 4           | 18              | 81.81             |

**Table S2.** Crop model parameters used to run APSIM models.

| Parameter                                                     | Range                             | Description                                                               | References                           |
|---------------------------------------------------------------|-----------------------------------|---------------------------------------------------------------------------|--------------------------------------|
| Fertilizer                                                    | 0 kg, 50 kg urea                  | Amount of fertilizer added at sowing and 40 days after sowing             | Field data                           |
| Sow dates                                                     | 1 Nov., 20 Nov., 10 Dec., 30 Dec. | Date when wheat was sown                                                  | Field data                           |
| Initial water                                                 | 32%, 60% and 100% filled          | Amount of initial soil water filled                                       | Field data; Singh et al., 2015       |
| Soil water deficit                                            | 10 mm, 40 mm                      | Amount of soil water deficit until farmers apply irrigation               | Default in APSIM; Singh et al., 2015 |
| Deficit calculated to this layer                              | 60 cm                             | Depth at which soil water deficit is calculated                           | Singh et al., 2015                   |
| Water applied when soil water deficit occurs                  | 0 mm, 10 mm, 70 mm                | Amount of water applied when deficit occurs (no, low, and typical)        | Field data; Singh et al., 2015       |
| Cultivar                                                      | PBW-343                           | Crop cultivar planted                                                     | Singh et al., 2015                   |
| Soil type                                                     | Silt (BARI-05, No. 663)           | Type of soil                                                              | Field data                           |
| Initial surface residue                                       | 1000 kg/ha of rice                | Amount of initial residue from previous crop                              | Field data                           |
| Sowing density                                                | 200 plants/m <sup>2</sup>         | Density wheat is sown                                                     | Singh et al., 2015                   |
| Sowing depth                                                  | 50 mm                             | Depth at which seed is sown                                               | Singh et al., 2015                   |
| Row spacing                                                   | 200 mm                            | Spacing between rows                                                      | Singh et al., 2015                   |
| Reset water, nitrogen, surface organic matter, and phosphorus | Yes, but did not reset phosphorus | Reset all nutrient parameters at the time of sowing except for phosphorus |                                      |
| CO <sub>2</sub>                                               | 400 ppm                           | Amount of CO <sub>2</sub> in atmosphere                                   |                                      |

**Table S3.** Correlation of mean GCVIs for all crop cut polygons for each image date.

|             | 2014–2015 Imagery |          |          |          |          |         |
|-------------|-------------------|----------|----------|----------|----------|---------|
|             | 18 February       | 11 March | 22 March | 23 March | 28 March | 6 April |
| 18 February | -                 | 0.188    | 0.098    | 0.069    | -0.131   | -0.137  |
| 11 March    | -                 | -        | 0.807    | 0.801    | 0.620    | 0.090   |
| 22 March    | -                 | -        | -        | 0.986    | 0.868    | 0.510   |
| 23 March    | -                 | -        | -        | -        | 0.886    | 0.502   |
| 28 March    | -                 | -        | -        | -        | -        | 0.455   |
| 6 April     | -                 | -        | -        | -        | -        | -       |

  

|             | 2015–2016 Imagery |           |             |          |         |   |
|-------------|-------------------|-----------|-------------|----------|---------|---|
|             | 21 December       | 3 January | 11 February | 16 March | 4 April | - |
| 21 December | -                 | 0.636     | 0.408       | -0.056   | -0.402  | - |
| 3 January   | -                 | -         | 0.71        | 0.007    | -0.369  | - |
| 11 February | -                 | -         | -           | 0.307    | -0.376  | - |
| 16 March    | -                 | -         | -           | -        | 0.458   | - |
| 4 April     | -                 | -         | -           | -        | -       | - |

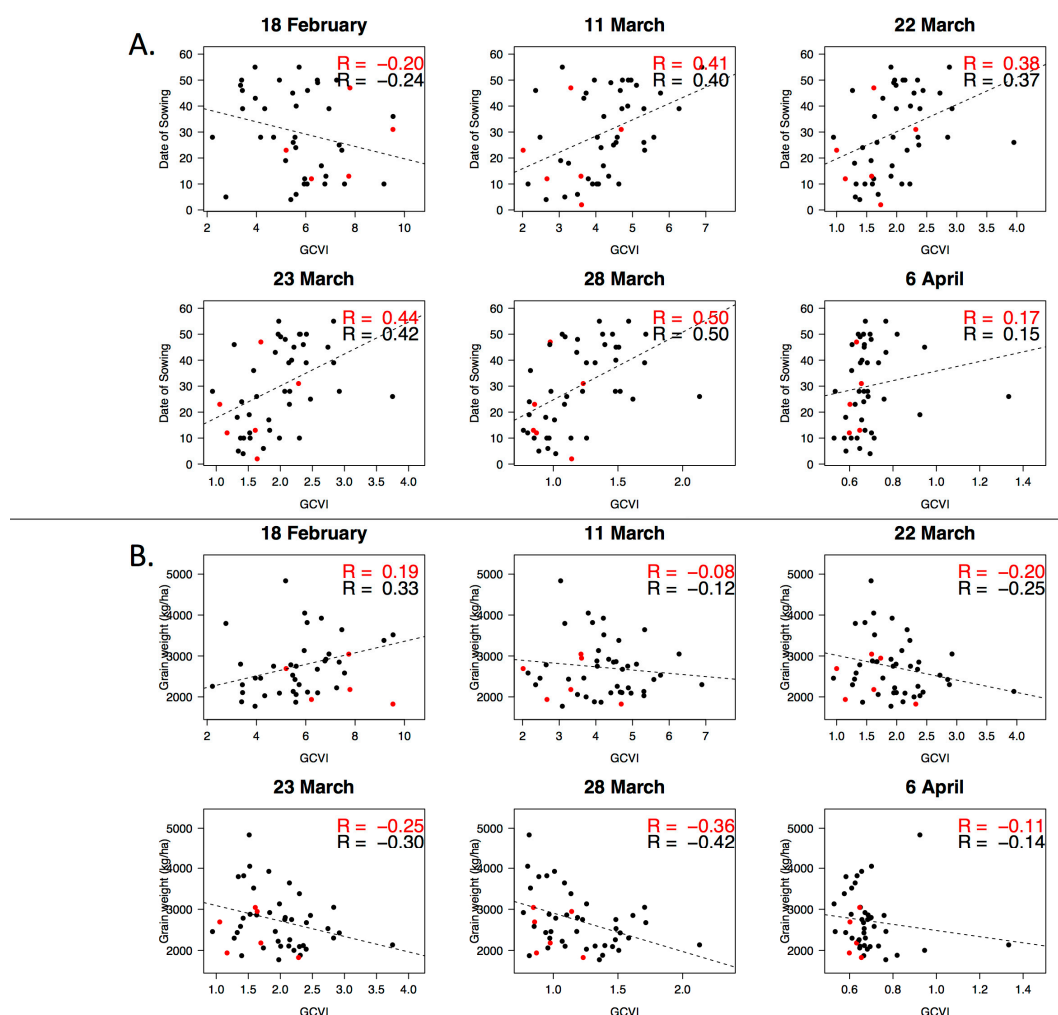

**Figure S1.** Scatterplots of GCVI versus sow date (A) or yield (B) for each image date in 2014–2015, with heavily lodged fields in red. Correlation values between GCVI and sow date (A) or yield (B) are shown. Red text represents correlation values including lodged fields, and black text shows correlation values with these lodged fields removed. The best fit line without lodged plots is highlighted with a dashed line in each graph.

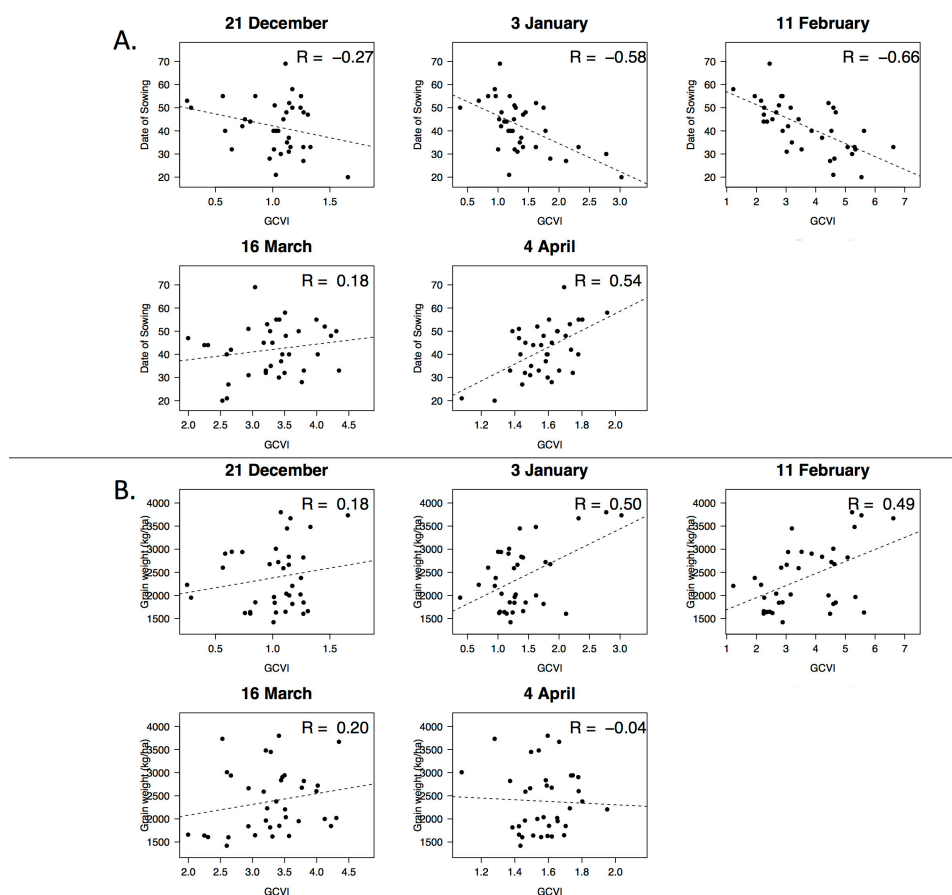

**Figure S2.** Scatterplots of GCVI versus sow date (A) or yield (B) for each image date in 2015–2016. Correlation values between GCVI and sow date (A) or yield (B) are shown. The best fit line is highlighted with a dashed line in each graph.

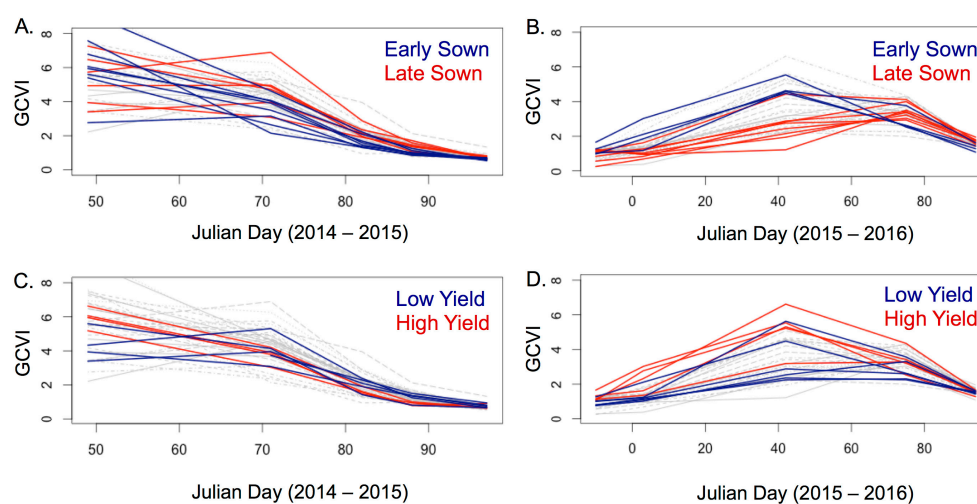

**Figure S3.** GCVI of each crop cut field throughout the growing season. Early versus late sown fields are highlighted in blue and red, respectively, in panels (A) and (B); and low versus high yielding fields are highlighted in blue and red respectively in panels (C) and (D).

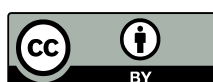

Supplement: s1 [file s1]
